# Supplementary material for: Recent advances in selective methanol oxidation electrocatalysts for the co-production of hydrogen and value-added formate
Source: Royal Society of Chemistry journal article supplement (doi:10.1039/d4cy00727a), 2024-01-01
Supplement: d4cy00727a1.pdf [file d4cy00727a1.pdf]

## **Electronic Supplementary Information**

### **Recent advances in selective methanol oxidation electrocatalysts for the co-production of hydrogen and value-added formate**

Jiixin Li, Hongmei Yu\*, Jingchen Na, Senyuan Jia, Yutong Zhao, Kaiqiu Lv, Wenzhuo Zhang, Jun Chi, Zhigang Shao\*

Fuel Cell System and Engineering Laboratory, Dalian Institute of Chemical Physics,  
Chinese Academy of Sciences, Dalian 116023, Liaoning, China

\*Corresponding author.

E-mail addresses: hmyu@dicp.ac.cn; zhgshao@dicp.ac.cn.

Table S1. The catalytic properties of the existing catalysts for SMOR

| Catalyst                                                                          | Electrolyte                          | Scan rate /mV s <sup>-1</sup> | Potential at a certain current density for SMOR/V vs. RHE                                                                   | Faradaic efficiency of formate/% | Stability/h               | Overpotential of HER/mV    | Potential at a certain current density for SMOR&HER/V vs. RHE | Ref. |
|-----------------------------------------------------------------------------------|--------------------------------------|-------------------------------|-----------------------------------------------------------------------------------------------------------------------------|----------------------------------|---------------------------|----------------------------|---------------------------------------------------------------|------|
| <b>Part A: Single atom catalyst</b>                                               |                                      |                               |                                                                                                                             |                                  |                           |                            |                                                               |      |
| Cu <sub>SA</sub> -Rh MAs/CF                                                       | 1 M KOH + 4 M CH <sub>3</sub> OH     | 5                             | 1.40@50 mA cm <sup>-2</sup><br>1.44@100 mA cm <sup>-2</sup><br>1.46@150 mA cm <sup>-2</sup><br>1.47@200 mA cm <sup>-2</sup> | ~90                              | /                         | /                          | /                                                             | 1    |
| Pt <sub>1</sub> /Ti <sub>0.8</sub> W <sub>0.2</sub> N <sub>x</sub> O <sub>y</sub> | 0.5 M KOH + 0.5 M CH <sub>3</sub> OH | 50                            | 0.82@560 mA mg <sup>-1</sup> <sub>Pt</sub>                                                                                  | 90                               | 10@0.8 V vs. RHE          | /                          | /                                                             | 2    |
| <b>Part B: Metal and metal alloy</b>                                              |                                      |                               |                                                                                                                             |                                  |                           |                            |                                                               |      |
| Ni/WC                                                                             | 1 M NaOH + 1 M CH <sub>3</sub> OH    | 5                             | /                                                                                                                           | 93.8                             | 10@0.5 V vs. Ag/AgCl      | /                          | /                                                             | 3    |
| Ni-NF-Af                                                                          | 1 M KOH + 0.5 M CH <sub>3</sub> OH   | 5                             | 1.345@100 mA cm <sup>-2</sup>                                                                                               | ~100                             | 5@100 mA cm <sup>-2</sup> | /                          | /                                                             | 4    |
| Ni-MOFs@350                                                                       | 1 M KOH + 1 M CH <sub>3</sub> OH     | 5                             | 1.37@100 mA cm <sup>-2</sup>                                                                                                | 98.4                             | Multistep CA (5 h/step)   | /                          | /                                                             | 5    |
| Ni-MOFs-120/NF                                                                    | 1 M KOH + 0.5 M CH <sub>3</sub> OH   | 5                             | 1.37@10 mA cm <sup>-2</sup><br>1.44@100 mA cm <sup>-2</sup>                                                                 | /                                | 20@1.4 V vs. RHE          | /                          | /                                                             | 6    |
| NiCo@NF                                                                           | 1 M KOH +                            | 5                             | 1.30@50 mA cm <sup>-2</sup>                                                                                                 | /                                | 50@50 mA                  | 220@50 mA cm <sup>-2</sup> | 1.41@25 mA cm <sup>-2</sup>                                   | 7    |

|                                        |                                       |    |                                                                                               |      |                               |                            |                             |    |
|----------------------------------------|---------------------------------------|----|-----------------------------------------------------------------------------------------------|------|-------------------------------|----------------------------|-----------------------------|----|
|                                        | 1 M CH <sub>3</sub> OH                |    | 1.42@100 mA cm <sup>-2</sup>                                                                  |      | cm <sup>-2</sup>              |                            |                             |    |
| NiCo-NF-ET                             | 1 M KOH +<br>0.5 M CH <sub>3</sub> OH | 5  | 1.228@10 mA cm <sup>-2</sup><br>1.272@50 mA cm <sup>-2</sup><br>1.291@100 mA cm <sup>-2</sup> | ~100 | 10@1.42 V<br>vs. RHE          | /                          | /                           | 8  |
| NiCu@Cu                                | 1 M KOH +<br>2 M CH <sub>3</sub> OH   | 5  | 1.32@10 mA cm <sup>-2</sup>                                                                   | >95  | 17@50 mA<br>cm <sup>-2</sup>  | 85@50 mA cm <sup>-2</sup>  | 1.45@10 mA cm <sup>-2</sup> | 9  |
| NiIr-MOF/NF                            | 1 M KOH +<br>4 M CH <sub>3</sub> OH   | 5  | 1.33@10 mA cm <sup>-2</sup><br>1.41@100 mA cm <sup>-2</sup>                                   | ~100 | 20@10 mA<br>cm <sup>-2</sup>  | 17@10 mA cm <sup>-2</sup>  | 1.39@10 mA cm <sup>-2</sup> | 10 |
| FeRu-MOF                               | 1 M KOH +<br>4 M CH <sub>3</sub> OH   | 5  | 1.32@10 mA cm <sup>-2</sup><br>1.37@100 mA cm <sup>-2</sup>                                   | >90  | 24@40 mA<br>cm <sup>-2</sup>  | 42@10 mA cm <sup>-2</sup>  | 1.40@10 mA cm <sup>-2</sup> | 11 |
| NiCoMo                                 | 1 M KOH +<br>1 M CH <sub>3</sub> OH   | 5  | 1.34@50 mA cm <sup>-2</sup><br>1.37@100 mA cm <sup>-2</sup><br>1.41@200 mA cm <sup>-2</sup>   | 85.5 | 50                            | 125@50 mA cm <sup>-2</sup> | 1.46@50 mA cm <sup>-2</sup> | 12 |
| <b>Part C: Oxide</b>                   |                                       |    |                                                                                               |      |                               |                            |                             |    |
| NiO/NF                                 | 1 M KOH +<br>1 M CH <sub>3</sub> OH   | 10 | 1.53@100 mA cm <sup>-2</sup>                                                                  | /    | 20000<br>s@1.82 V<br>vs. RHE  | /                          | /                           | 13 |
| Co <sub>3</sub> O <sub>4-x</sub> /NF-P | 1 M KOH +<br>1 M CH <sub>3</sub> OH   | /  | 1.318@10 mA cm <sup>-2</sup>                                                                  | >95  | 27@50 mA<br>cm <sup>-2</sup>  | /                          | 1.54@10 mA cm <sup>-2</sup> | 14 |
| Co-N-C/CoO/CF                          | 1 M KOH +<br>0.5 M CH <sub>3</sub> OH | 2  | 1.309@50 mA cm <sup>-2</sup>                                                                  | 98.2 | 120@1.4 V<br>vs. RHE          | /                          | /                           | 15 |
| Nb <sub>2</sub> O <sub>5</sub> /NF     | 1 M KOH +<br>1 M CH <sub>3</sub> OH   | /  | 1.47@100 mA cm <sup>-2</sup>                                                                  | ~100 | Multistep<br>CA<br>(2 h/step) | /                          | /                           | 16 |
| CuO/CF                                 | 1 M KOH +<br>1 M CH <sub>3</sub> OH   | 5  | /                                                                                             | ~100 | 24@1.82 V<br>vs. RHE          | /                          | /                           | 17 |

|                                                      |                                        |    |                                                              |        |                               |                            |                                                            |    |
|------------------------------------------------------|----------------------------------------|----|--------------------------------------------------------------|--------|-------------------------------|----------------------------|------------------------------------------------------------|----|
| CuO NS/CF                                            | 1 M KOH +<br>1 M CH <sub>3</sub> OH    | 5  | 1.47@100 mA cm <sup>-2</sup>                                 | 97     | 42@1.32 V<br>vs. RHE          | /                          | /                                                          | 18 |
| B/CuCo <sub>2</sub> O <sub>4</sub>                   | 1 M KOH +<br>1 M CH <sub>3</sub> OH    | 50 | /                                                            | 43     | 2@0.6 V<br>vs.<br>Ag/AgCl     | /                          | /                                                          | 19 |
| NiFe <sub>2</sub> O <sub>4</sub> /NF                 | 1 M KOH +<br>0.5 M CH <sub>3</sub> OH  | 5  | /                                                            | >95    | 6                             | /                          | /                                                          | 20 |
| LaCo <sub>0.5</sub> Fe <sub>0.5</sub> O <sub>3</sub> | 1 M KOH +<br>1 M CH <sub>3</sub> OH    | 10 | /                                                            | 44     | 2@1.6 V<br>vs. RHE            | /                          | /                                                          | 21 |
| <b>Part D: Hydroxide</b>                             |                                        |    |                                                              |        |                               |                            |                                                            |    |
| Ni(OH) <sub>2</sub> /NF                              | 1 M KOH +<br>0.5 M CH <sub>3</sub> OH  | 5  | 1.36@100 mA cm <sup>-2</sup>                                 | ~100   | 15@20 mA<br>cm <sup>-2</sup>  | 185@10 mA cm <sup>-2</sup> | 1.52@10 mA cm <sup>-2</sup><br>1.62@50 mA cm <sup>-2</sup> | 22 |
| β-Ni(OH) <sub>2</sub> /NF                            | 1 M KOH +<br>1 M CH <sub>3</sub> OH    | 5  | 1.398@10 mA cm <sup>-2</sup>                                 | 99.98  | 9@1.6 V<br>vs. RHE            | /                          | 1.684@10 mA cm <sup>-2</sup>                               | 23 |
| LC–<br>Ni(OH) <sub>2</sub> ·xH <sub>2</sub> O        | 1 M KOH +<br>0.5 M CH <sub>3</sub> OH  | 5  | 1.39@100 mA cm <sup>-2</sup>                                 | 100    | 100000<br>s@1.42 V<br>vs. RHE | /                          | /                                                          | 24 |
| Co <sup>2+</sup> -doped<br>Ni(OH) <sub>2</sub>       | 1 M NaOH +<br>0.5 M CH <sub>3</sub> OH | 1  | 1.32@100 mA cm <sup>-2</sup>                                 | ≥ 96.5 | 20@25 mA<br>cm <sup>-2</sup>  | /                          | /                                                          | 25 |
| NiMn-LDHs                                            | 1 M KOH +<br>3 M CH <sub>3</sub> OH    | 5  | 1.41@100 mA cm <sup>-2</sup><br>1.49@500 mA cm <sup>-2</sup> | ~100   | 20@100<br>mA cm <sup>-2</sup> | /                          | /                                                          | 26 |
| NiFe-LDHs                                            |                                        |    | 1.45@100 mA cm <sup>-2</sup><br>1.62@500 mA cm <sup>-2</sup> | /      | /                             | /                          | /                                                          |    |
| NiFe<br>LDH@SnO <sub>2</sub> /NF                     | 1 M KOH +<br>0.5 M CH <sub>3</sub> OH  | 5  | 1.396@10 mA cm <sup>-2</sup>                                 | /      | 12@100<br>mA cm <sup>-2</sup> | /                          | /                                                          | 27 |
| NiFe-LDH/NiFe-                                       | 1 M KOH +                              | /  | 1.416@10 mA cm <sup>-2</sup>                                 | ~100   | 28@20 mA                      | /                          | /                                                          | 28 |

|                                                             |                                       |    |                                                                                            |      |                                       |                            |                                                            |    |
|-------------------------------------------------------------|---------------------------------------|----|--------------------------------------------------------------------------------------------|------|---------------------------------------|----------------------------|------------------------------------------------------------|----|
| HAB/CF                                                      | 3 M CH <sub>3</sub> OH                |    | 1.538@100 mA cm <sup>-2</sup>                                                              |      | cm <sup>-2</sup>                      |                            |                                                            |    |
| Ni <sub>0.33</sub> Co <sub>0.67</sub> (OH) <sub>2</sub> /NF | 1 M KOH +<br>0.5 M CH <sub>3</sub> OH | 5  | 1.33@10 mA cm <sup>-2</sup>                                                                | ~100 | 20@1.35 V<br>vs. RHE                  | /                          | 1.5@10 mA cm <sup>-2</sup>                                 | 29 |
| NiCo-LDH-E-30/NF                                            | 1 M KOH +<br>1 M CH <sub>3</sub> OH   |    | 1.31@10 mA cm <sup>-2</sup><br>1.36@100 mA cm <sup>-2</sup>                                | >95  | 120@100<br>mA cm <sup>-2</sup>        | /                          | /                                                          | 30 |
| S-NiCo-LDH                                                  | 1 M KOH +<br>1 M CH <sub>3</sub> OH   | /  | 1.26@10 mA cm <sup>-2</sup><br>1.39@100 mA cm <sup>-2</sup>                                | ~100 | Multistep<br>CA<br>(2 h/step)         | /                          | /                                                          | 31 |
| Co <sub>x</sub> P@NiCo-LDH                                  | 1 M KOH +<br>0.5 M CH <sub>3</sub> OH | 5  | 1.24@10 mA cm <sup>-2</sup>                                                                | ~100 | 20@1.35 V<br>vs. RHE                  | 100@10 mA cm <sup>-2</sup> | 1.43@10 mA cm <sup>-2</sup><br>1.50@20 mA cm <sup>-2</sup> | 32 |
| NiFe <sub>x</sub> P@NiCo-LDH                                | 1 M KOH +<br>0.5 M CH <sub>3</sub> OH | 5  | /                                                                                          | 100  | 10@0.96 V<br>vs. RHE                  | 100@10 mA cm <sup>-2</sup> | 1.42@10 mA cm <sup>-2</sup>                                | 33 |
| NiCo <sub>x</sub> P@NiCo-LDH/CC                             | 1 M KOH +<br>0.5 M CH <sub>3</sub> OH | 5  | 1.23@10 mA cm <sup>-2</sup>                                                                | ~100 | 10@1.35 V<br>vs. RHE                  | 132@10 mA cm <sup>-2</sup> | 1.43@10 mA cm <sup>-2</sup>                                | 34 |
| NiCo-m                                                      | 1 M KOH +<br>3 M CH <sub>3</sub> OH   | 10 | 1.31@30 mA cm <sup>-2</sup><br>1.35@50 mA cm <sup>-2</sup><br>1.40@100 mA cm <sup>-2</sup> | /    | Multistep<br>CA                       | 200@50 mA cm <sup>-2</sup> | 1.50@20 mA cm <sup>-2</sup>                                | 35 |
| Cu <sub>0.33</sub> CoCo-LDH/CF                              | 1 M KOH +<br>3 M CH <sub>3</sub> OH   | /  | 1.28@10 mA cm <sup>-2</sup>                                                                | ~100 | 24@20 mA<br>cm <sup>-2</sup>          | /                          | /                                                          | 36 |
| <b>Part E: Nonmetal alloy</b>                               |                                       |    |                                                                                            |      |                                       |                            |                                                            |    |
| Ni <sub>3</sub> C                                           | 1 M KOH +<br>0.5 M CH <sub>3</sub> OH | /  | /                                                                                          | 100  | 50000<br>s@120 mA<br>cm <sup>-2</sup> | /                          | /                                                          | 37 |
| Cu <sub>3</sub> N                                           | 1 M KOH +<br>1 M CH <sub>3</sub> OH   | /  | 1.35@10 mA cm <sup>-2</sup>                                                                | >90  | 12                                    | /                          | /                                                          | 38 |
| Ni-MoN/NF                                                   | 1 M KOH +                             | 5  | 1.48@100 mA cm <sup>-2</sup>                                                               | 99.8 | /                                     | 49@10 mA cm <sup>-2</sup>  | 0.56@10 mA cm <sup>-2</sup>                                | 39 |

|                                                       |                                       |    |                                                                                                                             |       |                               |                             |                             |    |
|-------------------------------------------------------|---------------------------------------|----|-----------------------------------------------------------------------------------------------------------------------------|-------|-------------------------------|-----------------------------|-----------------------------|----|
|                                                       | 0.5 M CH <sub>3</sub> OH              |    |                                                                                                                             |       |                               | 193@100 mA cm <sup>-2</sup> |                             |    |
| Ni <sub>2</sub> Co <sub>2</sub> Fe <sub>1</sub> -P    | 1 M KOH +<br>2 M CH <sub>3</sub> OH   | 1  | 1.49@20 mA cm <sup>-2</sup>                                                                                                 | /     | Multistep<br>CA<br>(1 h/step) | 61@20 mA cm <sup>-2</sup>   | 1.48@20 mA cm <sup>-2</sup> | 40 |
| NiS                                                   | 1 M KOH +<br>1 M CH <sub>3</sub> OH   | 50 | /                                                                                                                           | 98    | 3@1.6 V<br>vs. RHE            | /                           | /                           | 41 |
| Ni <sub>3</sub> S <sub>2</sub> /CNTs                  | 1 M KOH +<br>1 M CH <sub>3</sub> OH   | /  | 1.36@100 mA cm <sup>-2</sup>                                                                                                | >95   | 20@100<br>mA cm <sup>-2</sup> | /                           | /                           | 42 |
| Ni <sub>3</sub> S <sub>2</sub> -CNFs                  | 1 M KOH +<br>1 M CH <sub>3</sub> OH   | 5  | 1.40@100 mA cm <sup>-2</sup>                                                                                                | 99.82 | 3@1.62 V<br>vs. RHE           | /                           | /                           | 43 |
| CC@NiCo <sub>2</sub> S <sub>4</sub>                   | 1 M KOH +<br>1 M CH <sub>3</sub> OH   | 5  | 1.40@100 mA cm <sup>-2</sup>                                                                                                | ~100  | 3@1.7 V<br>vs. RHE            |                             | 1.32@10 mA cm <sup>-2</sup> | 44 |
| FCNS@NF                                               | 1 M KOH +<br>1 M CH <sub>3</sub> OH   | 2  | 1.42@100 mA cm <sup>-2</sup>                                                                                                | 98.67 | 10@1.4 V<br>vs. RHE           | /                           | /                           | 45 |
| h-NiSe/CNTs                                           | 1 M KOH +<br>1 M CH <sub>3</sub> OH   | 5  | 1.57@50 mA cm <sup>-2</sup><br>1.66@100 mA cm <sup>-2</sup><br>1.75@200 mA cm <sup>-2</sup><br>1.91@400 mA cm <sup>-2</sup> | 97.97 | 20@1.62 V<br>vs. RHE          | /                           | /                           | 46 |
| CNFs@NiSe/CC                                          | 1 M KOH +<br>1 M CH <sub>3</sub> OH   | 5  | 1.47@200 mA cm <sup>-2</sup><br>1.50@300 mA cm <sup>-2</sup><br>1.55@400 mA cm <sup>-2</sup>                                | >98   | 20@1.62 V<br>vs. RHE          | /                           | /                           | 47 |
| Ni <sub>0.9</sub> Co <sub>0.1</sub> Se                | 1 M NaOH +<br>1 M CH <sub>3</sub> OH  | 10 | 1.65@185 mA cm <sup>-2</sup>                                                                                                | 84    | /                             | /                           | /                           | 48 |
| Ni <sub>0.75</sub> Fe <sub>0.25</sub> Se <sub>2</sub> | 1 M KOH +<br>0.5 M CH <sub>3</sub> OH | 50 | /                                                                                                                           | 99.7  | 10000<br>s@1.48 V<br>vs. RHE  | /                           | /                           | 49 |

|                                                         |                                                                    |    |                                                             |       |                                 |                             |                                                             |    |
|---------------------------------------------------------|--------------------------------------------------------------------|----|-------------------------------------------------------------|-------|---------------------------------|-----------------------------|-------------------------------------------------------------|----|
| NiP <sub>x</sub> -R                                     | 1 M KOH +<br>0.5 M CH <sub>3</sub> OH                              | 5  | 1.40@400 mA cm <sup>-2</sup>                                | /     | /                               | /                           | /                                                           | 50 |
| NiS <sub>x</sub> -R                                     |                                                                    |    | 1.49@400 mA cm <sup>-2</sup>                                |       |                                 | /                           | /                                                           |    |
| NiSe <sub>x</sub> -R                                    |                                                                    |    | 1.517@400 mA cm <sup>-2</sup>                               |       |                                 | /                           | /                                                           |    |
| <b>Part F: Multi-component heterostructure catalyst</b> |                                                                    |    |                                                             |       |                                 |                             |                                                             |    |
| Pt-Co <sub>3</sub> O <sub>4</sub> /CP                   | 1 M NaOH +<br>2 M CH <sub>3</sub> OH+<br>3.5%NaCl                  | 5  | 0.555@10 mA cm <sup>-2</sup>                                | ~93   | /                               | 50@10 mA cm <sup>-2</sup>   | 0.55@10 mA cm <sup>-2</sup>                                 | 51 |
| Ru&Fe-WO <sub>x</sub>                                   | 1 M NaOH +<br>3 M CH <sub>3</sub> OH                               | /  | 1.35@10 mA cm <sup>-2</sup><br>1.51@500 mA cm <sup>-2</sup> | ~100  | 37.5@500<br>mA cm <sup>-2</sup> | 32@10 mA cm <sup>-2</sup>   | 1.5@100 mA cm <sup>-2</sup><br>1.62@500 mA cm <sup>-2</sup> | 52 |
| CuS@CuO/CF                                              | 1 M KOH +<br>1 M CH <sub>3</sub> OH                                | 10 | /                                                           | 99%   | 6                               | /                           | /                                                           | 53 |
| CeO <sub>2</sub> -RuO <sub>2</sub>                      | 0.5 M H <sub>2</sub> SO <sub>4</sub> +<br>2.5 M CH <sub>3</sub> OH | 10 | 1.195@10 mA cm <sup>-2</sup>                                | 53.72 | 24@1.32 V<br>vs. RHE            | /                           | 1.30@10 mA cm <sup>-2</sup>                                 | 54 |
| Fe <sub>2</sub> O <sub>3</sub> /NiO-NF                  | 1 M KOH +<br>1 M CH <sub>3</sub> OH                                | 5  | 1.328@onset<br>1.654@500 mA cm <sup>-2</sup>                | >98   | 40@300<br>mA cm <sup>-2</sup>   | /                           | /                                                           | 55 |
| Bi <sub>2</sub> O <sub>3</sub> -SnO@CuO                 | 1 M KOH +<br>1 M CH <sub>3</sub> OH                                | 5  | 1.53@100 mA cm <sup>-2</sup>                                | ~100  | 8@1.7 V<br>vs. RHE              | /                           | /                                                           | 56 |
| CNTs@CoO–<br>Ni(OH) <sub>2</sub>                        | 1 M KOH +<br>1 M CH <sub>3</sub> OH                                | 5  | 1.36@100 mA cm <sup>-2</sup>                                | >95   | 40@1.4 V<br>vs. RHE             | /                           | 1.39@10 mA cm <sup>-2</sup>                                 | 57 |
| Cu(OH) <sub>2</sub> @NiFe(<br>OH) <sub>x</sub>          | 1 M KOH +<br>3 M CH <sub>3</sub> OH                                | /  | 1.32@60 mA cm <sup>-2</sup>                                 | ~100  | 22@10 mA<br>cm <sup>-2</sup>    | /                           | /                                                           | 58 |
| Ni <sub>3</sub> B/Ni                                    | 1 M KOH +<br>1 M CH <sub>3</sub> OH                                | 5  | /                                                           | ~100  | 24@100<br>mA cm <sup>-2</sup>   | /                           | /                                                           | 59 |
| Co-Ni-P/NF                                              | 1 M KOH +<br>0.5 M CH <sub>3</sub> OH                              | 5  | 1.33@100 mA cm <sup>-2</sup>                                | 100   | 20@100<br>mA cm <sup>-2</sup>   | 145@100 mA cm <sup>-2</sup> | 1.45@100 mA cm <sup>-2</sup>                                | 60 |
| Ni <sub>2</sub> P-CoP/NF                                | 1 M KOH +                                                          | /  | 1.16@10 mA cm <sup>-2</sup>                                 | 99.8  | 20@20 mA                        | 96@10 mA cm <sup>-2</sup>   | 1.56@50 mA cm <sup>-2</sup>                                 | 61 |

|                                                    |                                     |   |                                                             |     |                                      |                             |   |    |
|----------------------------------------------------|-------------------------------------|---|-------------------------------------------------------------|-----|--------------------------------------|-----------------------------|---|----|
|                                                    | 0.5 M CH <sub>3</sub> OH            |   | 1.27@50 mA cm <sup>-2</sup><br>1.30@100 mA cm <sup>-2</sup> |     | cm <sup>-2</sup>                     | 160@100 mA cm <sup>-2</sup> |   |    |
| Cu <sub>2</sub> Se/Co <sub>3</sub> Se <sub>4</sub> | 1 M KOH +<br>1 M CH <sub>3</sub> OH | 5 | 1.39@10 mA cm <sup>-2</sup>                                 | 100 | 20000<br>s@10 mA<br>cm <sup>-2</sup> | /                           | / | 62 |



## References

1. Q. Mao, X. Mu, W. Wang, K. Deng, H. Yu, Z. Wang, Y. Xu, L. Wang and H. Wang, *Nat. Commun.*, 2023, **14**, 5679.
2. Y. A. Awoke, M.-C. Tsai, D. B. Adam, A. A. Ayele, S.-C. Yang, W.-H. Huang, J.-L. Chen, C.-W. Pao, C. Y. Mou, W.-N. Su and B. J. Hwang, *Electrochim. Acta*, 2022, **432**, 141161.
3. M. Zhang, J. Zhu, R. Wan, B. Liu, D. Zhang, C. Zhang, J. Wang and J. Niu, *Chem. Mater.*, 2022, **34**, 959-969.
4. C. Cao, D. Ma, J. Jia, Q. Xu, X. Wu and Q. Zhu, *Adv. Mater.*, 2021, **33**, 2008631.
5. Y. Zhou, Z. Wang, W. Fang, R. Qi, Z. Wang, C. Xia, K. Lei, B. You, X. Yang, Y. Liu, W. Guo, Y. Su, S. Ding and B. Y. Xia, *ACS Catal.*, 2023, **13**, 2039-2046.
6. J. Li, *Electrochem. Commun.*, 2023, **146**, 107416.
7. F. Arshad, A. Tahir, T. u. Haq, H. Duran, I. Hussain and F. Sher, *Energ. Fuel.*, 2023, **37**, 14161-14170.
8. J. Tian, C. Cao, D. Ma, S. Han, Y. He, X. Wu and Q. Zhu, *Small Struct.*, 2022, **3**, 2100134.
9. F. Arshad, A. Tahir, T. u. Haq, H. Duran, I. Hussain and F. Sher, *Int. J. Hydrogen Energy*, 2022, **47**, 36118-36128.
10. Y. Xu, M. Liu, M. Wang, T. Ren, K. Ren, Z. Wang, X. Li, L. Wang and H. Wang, *Appl. Catal. B.*, 2022, **300**, 120753.
11. Q. Ling, Z. Zhao, Z. Li, K. Yan, C. Ding, P. Chen, Z. Sun, G. He, J. Lv and M. Zhang, *J. Mater. Chem. A*, 2023, **11**, 2876-2888.
12. J. Chen, M. Ahmad, Y. Zhang, H. Ye, L. Wang, J. Zhang, X. Fu and J. Luo, *Chem. Eng. J.*, 2023, **454**, 140056.
13. M. I. Abdullah, A. Hameed, N. Zhang, M. H. Islam, M. Ma and B. G. Pollet, *ACS Appl. Mater. Inter.*, 2021, **13**, 30603-30613.
14. J. Zhang, Y. Hua, H. Li, X. Zhang, C. Shi, Y. Li, L. Di and Z. Wang, *Chem. Eng. J.*, 2023, **478**, 147288.
15. Y. Wang, X. Yang, K. Wang, Z. Liu, X. Sun, J. Chen, S. Liu, X. Sun, J. Xie and B. Tang, *Green Chem.*, 2023, **25**, 8216-8225.
16. X. Wang, C. Xiao, Y. Li, T. Murayama, T. Ishida, M. Lin and G. Xiu, *Appl. Catal. A-Gen*, 2023, **664**, 119341.
17. M. Khan, A. Hameed, A. Samad, T. Mushiana, M. I. Abdullah, A. Akhtar, R. S. Ashraf, N. Zhang, B. G. Pollet, U. Schwingenschlöggl and M. Ma, *Commun. Chem.*, 2022, **5**, 109.
18. X. Wei, Y. Li, L. Chen and J. Shi, *Angew. Chem. Int. Edit.*, 2021, **60**, 3148-3155.
19. N. Kumar T R, S. Kamalakannan, M. Prakash, B. Viswanathan and B. Neppolian, *ACS Appl. Energ. Mater.*, 2022, **5**, 2104-2111.
20. X. Du, M. Tan, T. Wei, H. Kobayashi, J. Song, Z. Peng, H. Zhu, Z. Jin, R. Li and W. Liu, *Chem. Eng. J.*, 2023, **452**, 139404.
21. F. Meng, C. Dai, Z. Liu, S. Luo, J. Ge, Y. Duan, G. Chen, C. Wei, R. R. Chen, J. Wang, D. Mandler and Z. J. Xu, *eScience*, 2022, **2**, 87-94.
22. J. Hao, J. Liu, D. Wu, M. Chen, Y. Liang, Q. Wang, L. Wang, X. Fu and J. Luo, *Appl. Catal. B-Environ*, 2021, **281**, 119510.
23. L. Gong, N. Xuan, G. Gu, P. Lv, N. Huang, C. Song, M. Zheng, J. Wang, P. Cui, G. Gu, Y. Jia, G. Cheng and Z. Du, *Nano Energy*, 2023, **107**, 108124.

24. G. Fu, X. Kang, Y. Zhang, X. Yang, L. Wang, X. Fu, J. Zhang, J. Luo and J. Liu, *Nano-Micro Lett.*, 2022, **14**, 200.
25. L. Ming, X. Wu, S. Wang, W. Wu and C. Lu, *ChemElectroChem*, 2022, **9**, e202200522.
26. B. Zhu, B. Dong, F. Wang, Q. Yang, Y. He, C. Zhang, P. Jin and L. Feng, *Nat. Commun.*, 2023, **14**, 1686.
27. C. Wan, J. Jin, X. Wei, S. Chen, Y. Zhang, T. Zhu and H. Qu, *J. Mater. Sci. Technol.*, 2022, **124**, 102-108.
28. S. Jiang, T. Xiao, C. Xu, S. Wang, H. Peng, W. Zhang, B. Liu and Y. Song, *Small*, 2023, **19**, 2208027.
29. M. Li, X. Deng, K. Xiang, Y. Liang, B. Zhao, J. Hao, J. Luo and X. Fu, *ChemSusChem*, 2020, **13**, 914-921.
30. H. Chi, J. Lin, S. Kuang, M. Li, H. Liu, Q. Fan, T. Yan, S. Zhang and X. Ma, *J. Energy Chem.*, 2023, **85**, 267-275.
31. C. Xiao, L. Cheng, Y. Wang, J. Liu, R. Chen, H. Jiang, Y. Li and C. Li, *J. Mater. Chem. A*, 2022, **10**, 1329-1335.
32. M. Li, X. Deng, Y. Liang, K. Xiang, D. Wu, B. Zhao, H. Yang, J.-L. Luo and X.-Z. Fu, *J. Energy Chem.*, 2020, **50**, 314-323.
33. Y. Zhang, X. Wu, G. Fu, F. Si, X. Fu and J. Luo, *Int. J. Hydrogen Energy*, 2022, **47**, 17150-17160.
34. Y. Zhang, X. Wu, G. Fu, X. Fu and J. Luo, *J. Alloy. Compd.*, 2022, **906**, 164305.
35. B. Liu, X. Wang, S. Wang, H. Peng, T. Xiao, G. Liu, S. Bai, Y. Zhao, W. Zhang and Y. Song, *Mater. Today Energy*, 2022, **28**, 101082.
36. B. Liu, T. Xiao, X. Sun, H.-Q. Peng, X. Wang, Y. Zhao, W. Zhang and Y.-F. Song, *J. Mater. Chem. A*, 2022, **10**, 19649-19661.
37. J. Li, R. Wei, X. Wang, Y. Zuo, X. Han, J. Arbiol, J. Llorca, Y. Yang, A. Cabot and C. Cui, *Angew. Chem. Int. Ed.*, 2020, **59**, 20826-20830.
38. L. Zhao, Q. Sun, M. Li, Y. Zhong, P. Shen, Y. Lin and K. Xu, *Sci. China Mater.*, 2023, **66**, 1820-1828.
39. C. Rao, H. Wang, K. Chen, H. Chen, S. Ci, Q. Xu and Z. Wen, *Small*, 2024, **20**, 2303300.
40. J. Chang, W. Wang, D. Wu, F. Xu, K. Jiang, Y. Guo and Z. Gao, *J. Colloid Interf. Sci.*, 2023, **648**, 259-269.
41. J. Li, X. Tian, X. Wang, T. Zhang, M. C. Spadaro, J. Arbiol, L. Li, Y. Zuo and A. Cabot, *Inorg. Chem.*, 2022, **61**, 13433-13441.
42. B. Zhao, C. Xu, M. Shakouri, R. Feng, Y. Zhang, J. Liu, L. Wang, J. Zhang, J.-L. Luo and X.-Z. Fu, *Appl. Catal. B.*, 2022, **305**, 121082.
43. B. Zhao, J. Liu, X. Wang, C. Xu, P. Sui, R. Feng, L. Wang, J. Zhang, J. Luo and X. Fu, *Nano Energy*, 2021, **80**, 105530.
44. F. Si, J. Liu, Y. Zhang, B. Zhao, Y. Liang, X. Wu, X. Kang, X. Yang, J. Zhang, X. Fu and J. Luo, *Small*, 2023, **19**, 2205257.
45. Y. Yi, J. Li and C. Cui, *Chinese Chem. Lett.*, 2022, **33**, 1006-1010.
46. B. Zhao, J. Liu, C. Xu, R. Feng, P. Sui, L. Wang, J. Zhang, J. Luo and X. Fu, *Adv. Funct. Mater.*, 2021, **31**, 2008812.
47. B. Zhao, J. W. Liu, Y. R. Yin, D. Wu, J. L. Luo and X. Z. Fu, *J. Mater. Chem. A*, 2019, **7**, 25878-25886.

48. S. Ganguly, S. Paul, D. Khurana, T. S. Khan, P. K. Giri, C. Loha and S. Ghosh, *ACS Appl. Energ. Mater.*, 2023, **6**, 5331-5341.
49. J. Li, C. Xing, Y. Zhang, T. Zhang, M. C. Spadaro, Q. Wu, Y. Yi, S. He, J. Llorca, J. Arbiol, A. Cabot and C. Cui, *Small*, 2021, **17**, 2006623.
50. S. Li, R. Ma, J. Hu, Z. Li, L. Liu, X. Wang, Y. Lu, G. E. Sterbinsky, S. Liu, L. Zheng, J. Liu, D. Liu and J. Wang, *Nat. Commun.*, 2022, **13**, 2916.
51. K. Xiang, Z. Song, D. Wu, X. Deng, X. Wang, W. You, Z. Peng, L. Wang, J.-L. Luo and X.-Z. Fu, *J. Mater. Chem. A*, 2021, **9**, 6316-6324.
52. Q. Yang, C. Zhang, B. Dong, Y. Cui, F. Wang, J. Cai, P. Jin and L. Feng, *Appl. Catal. B-Environ*, 2021, **296**, 120359.
53. M. Khan, M. I. Abdullah, A. Samad, Z. Shao, T. Mushiana, A. Akhtar, A. Hameed, N. Zhang, U. Schwingenschlögl and M. Ma, *Small*, 2023, **19**, 2205499.
54. M. Li, D. Zhang, Y. Yi, B. Xue and B. Liu, *Electrochim. Acta*, 2022, **423**, 140566.
55. Y. Hao, D. Yu, S. Zhu, C. Kuo, Y. Chang, L. Wang, H. Chen, M. Shao and S. Peng, *Energ. Environ. Sci*, 2023, **16**, 1100-1110.
56. Z. Tang, Y. Wang, W. Qian, Z. Piao, H. Wang and Y. Zhang, *J. Colloid Interf. Sci.*, 2023, **652**, 1653-1664.
57. K. Deng, P. Liu, X. Liu, H. Li, W. Tian and J. Ji, *Green Chem.*, 2023, **25**, 9837-9846.
58. Y. Liang, Z. Song, Y. Zhang, B. Zhao, X. Wang, K. Xiang, Z. Ge, X. Fu and J. Luo, *Acs Appl. Nano. Mater.*, 2021, **4**, 8723-8732.
59. Y. Qi, Y. Zhang, L. Yang, Y. Zhao, Y. Zhu, H. Jiang and C. Li, *Nat. Commun.*, 2022, **13**, 4602.
60. X. Yue, S. Liping, H. Lihua and Z. Hui, *Acs Appl. Nano. Mater.*, 2023, **6**, 10312-10321.
61. D. Wu, J. Hao, W. Wang, Y. Yu, X. Fu and J. Luo, *ChemSusChem*, 2021, **14**, 5450-5459.
62. B. Zhao, J. Liu, C. Xu, R. Feng, P. Sui, J.-X. Luo, L. Wang, J. Zhang, J.-L. Luo and X.-Z. Fu, *Appl. Catal. B-Environ*, 2021, **285**, 119800.
